# Supplementary material for: Can the Addition of Maintenance Electroconvulsive Therapy to Pharmacotherapy Improve Relapse Prevention in Severe Major Depressive Disorder? A Randomized Controlled Trial
Source: MDPI journal article supplement (doi:10.3390/brainsci11101340), 2021-10-11

Data supplement.

**Figure S1.** Kaplan-Meier function of the cumulative probability of remaining in remission at 15 months (log-rank test = 0.143).

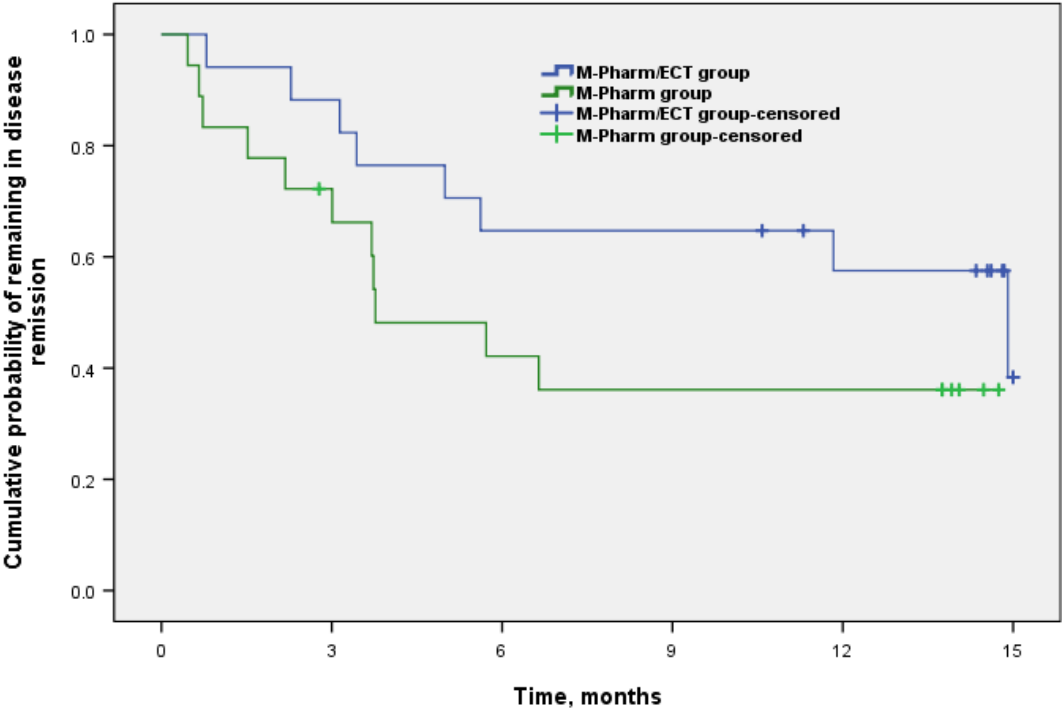

Supplement: s1 [file s1]
